# Supplementary material for: Global increase and geographic convergence in antibiotic consumption between 2000 and 2015
Source: PubMed Central journal article supplement (PMC5899442; doi:10.1073/pnas.1717295115), 2018-03-26
Supplement: pnas.1717295115.sapp.pdf [file pnas.1717295115.sapp.pdf]

## Supporting Information Appendix

for

## Global increase and geographic convergence in antibiotic consumption between 2000 and 2015

Eili Y. Klein,<sup>a,b,c</sup> Thomas P. Van Boeckel,<sup>d</sup> Elena M. Martinez,<sup>a</sup> Suraj Pant,<sup>a</sup> Sumanth Gandra,<sup>a</sup> Simon A. Levin<sup>e,f,g</sup>, Herman Goossens,<sup>h</sup> and Ramanan Laxminarayan<sup>a,f,i</sup>

<sup>a</sup> Center for Disease Dynamics, Economics & Policy, Washington, DC, USA

<sup>b</sup> Department of Emergency Medicine, Johns Hopkins School of Medicine, Baltimore, MD, USA

<sup>c</sup> Department of Epidemiology, Johns Hopkins Bloomberg School of Public Health, Baltimore, MD, USA

<sup>d</sup> Institute of Integrative Biology, Eidgenössische Technische Hochschule (ETH) Zürich, Switzerland

<sup>e</sup> Department of Ecology and Evolutionary Biology, Princeton University, Princeton, NJ, USA

<sup>f</sup> Princeton Environmental Institute, Princeton University, Princeton, NJ, USA

<sup>g</sup> Beijer Institute of Ecological Economics, Stockholm, Sweden

<sup>h</sup> Laboratory of Medical Microbiology, Vaccine & Infectious Diseases Institute, University of Antwerp, Antwerp, Belgium.

<sup>i</sup> Department of Global Health, University of Washington, Seattle, WA, USA

**Supplementary Table 1. Years for which data were available by country/region and sector**

| Country                | Sector    |           | Country              | Sector    |           |
|------------------------|-----------|-----------|----------------------|-----------|-----------|
|                        | Hospital  | Retail    |                      | Hospital  | Retail    |
| Algeria                | –         | 2002–2015 | Lithuania†           | 2002–2015 | 2000–2015 |
| Argentina              | –         | 2000–2015 | Luxembourg           | –         | 2000–2015 |
| Australia              | 2000–2015 | 2000–2015 | Malaysia             | 2000–2015 | 2000–2015 |
| Austria†               | 2005–2015 | 2000–2015 | Mexico†              | 2005–2015 | 2000–2015 |
| Bangladesh             | –         | 2005–2015 | Morocco              | –         | 2000–2015 |
| Belgium                | 2000–2015 | 2000–2015 | Netherlands          | 2005–2015 | 2005–2015 |
| Bosnia and Herzegovina | –         | 2011–2015 | New Zealand          | 2000–2015 | 2000–2015 |
| Brazil†                | 2005–2015 | 2000–2015 | Norway               | 2000–2015 | 2000–2015 |
| Bulgaria               | 2000–2015 | 2000–2015 | Pakistan             | –         | 2000–2015 |
| Canada                 | 2000–2015 | 2000–2015 | Peru                 | –         | 2000–2015 |
| Central America*       | –         | 2000–2015 | Philippines          | 2000–2015 | 2000–2015 |
| Chile                  | –         | 2000–2015 | Poland               | 2000–2015 | 2000–2015 |
| China†                 | 2000–2015 | 2011–2015 | Portugal†            | 2005–2015 | 2000–2015 |
| Colombia               | –         | 2000–2015 | Puerto Rico          | 2000–2015 | 2000–2015 |
| Croatia                | 2005–2015 | 2005–2015 | Romania†             | 2005–2015 | 2000–2015 |
| Czech Republic         | 2000–2015 | 2000–2015 | Russia               | 2000–2015 | 2000–2015 |
| Denmark                | –         | 2000–2015 | Saudi Arabia         | –         | 2000–2015 |
| Dominican Republic     | –         | 2000–2015 | Serbia               | –         | 2011–2015 |
| Ecuador                | –         | 2000–2015 | Singapore            | 2000–2015 | 2000–2015 |
| Egypt                  | –         | 2000–2015 | Slovakia             | 2000–2015 | 2000–2015 |
| Estonia                | 2002–2004 | 2000–2015 | Slovenia             | –         | 2000–2015 |
| Finland                | 2000–2015 | 2000–2015 | South Africa         | 2000–2015 | 2000–2015 |
| France                 | 2000–2015 | 2000–2015 | South Korea          | 2000–2015 | 2000–2015 |
| French West Africa**   | –         | 2000–2015 | Spain                | 2000–2015 | 2000–2015 |
| Germany                | 2000–2015 | 2000–2015 | Sri Lanka            | –         | 2007–2015 |
| Greece                 | –         | 2000–2015 | Sweden               | –         | 2000–2015 |
| Hong Kong†             | 2000–2004 | 2000–2015 | Switzerland          | 2000–2015 | 2000–2015 |
| Hungary                | 2000–2015 | 2000–2015 | Taiwan               | 2000–2015 | 2005–2015 |
| India                  | 2005–2015 | 2000–2015 | Thailand             | 2000–2015 | 2000–2015 |
| Indonesia†             | 2000–2004 | 2000–2015 | Tunisia†             | 2011–2015 | 2000–2015 |
| Ireland†               | 2006–2015 | 2000–2015 | Turkey               | 2000–2015 | 2000–2015 |
| Italy                  | 2000–2015 | 2000–2015 | Ukraine              | 2010–2015 | 2010–2015 |
| Japan                  | 2000–2015 | 2000–2015 | United Arab Emirates | –         | 2000–2015 |
| Jordan                 | –         | 2000–2015 | United Kingdom       | 2000–2015 | 2000–2015 |
| Kazakhstan†            | 2008–2015 | 2005–2015 | United States        | 2000–2015 | 2000–2015 |
| Kuwait                 | –         | 2000–2015 | Uruguay              | –         | 2000–2015 |
| Latvia                 | –         | 2000–2015 | Venezuela            | –         | 2000–2015 |
| Lebanon                | –         | 2000–2015 | Vietnam              | 2005–2015 | 2005–2015 |

*Data Source:* IQVIA MIDAS, 2000–2015, IQVIA Inc. All rights reserved. \* Central America includes: Costa Rica, El Salvador, Guatemala, Honduras, Nicaragua, Panama; \*\* French West Africa includes: Benin, Cameroon, Burkina Faso, Chad, Cote d'Ivoire, Congo, Rep., Guinea, Mali, Niger, Senegal, Togo. † In these countries, hospital and retail data were both reported for some but not all years. To adjust for this, we used the ratio of antibiotic consumption in the hospital and retail sectors for the years both were reported to estimate the amount for the sector in the years not reported

## Supplementary Methods

### *Identifying and estimating DDD unit values for conversion from SU to KG*

Defined daily doses (DDDs) were calculated from kilogram data using the ATC/DDD index for 2016, developed by the WHO Collaborating Centre for Drug Statistics Methodology. DDD unit values were provided in the ATC/DDD index for 199 of the molecules in the IQVIA MIDAS database. When possible, DDD unit values not available through the ATC/DDD index were estimated from other sources (Supplementary Table 2). The DDD unit value for xibornol was identified through the MIMS Drug Information System, and the value for bacitracin was estimated using the conversion between international units and grams provided by etoolsage.com. For polymyxins, the sales data were not available in kilograms, so the largest-selling polymyxin product worldwide was chosen as the reference product to generate DDD values using information from Falagas and Kasiakou (1). Specifically, we assumed that 1 SU = 1 vial which was assumed to contain 80 mg of colistimethate sodium (1). As the ATC/DDD index has 3 million IU for the DDD, we converted to IU using the conversion rate of 12,500 IU per mg of colistimethate sodium. The same conversion was used for polymyxin B parenteral administration. For the remaining molecules for which no DDD unit value was available, DDD unit value was estimated as the average value for each antibiotic class by route of administration (Supplementary Table 3). In addition, several molecules had a route of administration for which no DDD unit value was available or were combination drugs for which no DDD unit value was specified, in these cases the DDD was calculated as the average DDD of other routes (Supplementary Table 4).

**Supplementary Table 2: DDD Source for molecules with no DDD unit value in ATC/DDD database**

| <b>Antibiotic</b>  | <b>Route of administration</b> | <b>DDD (gm)</b> | <b>Source</b> |
|--------------------|--------------------------------|-----------------|---------------|
| Cefathiamidine     | Parenteral                     | 4               | (2)           |
| Cefroxadine        | Oral                           | 2.1             | (3)           |
| Cefteram Pivoxil   | Oral                           | 0.6             | (3)           |
| Faropenem          | Oral                           | 0.9             | (3)           |
| Lenampicillin      | Oral                           | 1               | (3)           |
| Lomefloxacin       | Oral                           | 0.6             | (3)           |
| Micronomicin       | Parenteral                     | 0.24            | (4)           |
| Polymyxin B        | Oral                           | 0.387           | (3)           |
| Tosufloxacin       | Oral                           | 0.6             | (3)           |
| Acetyl Kitasamycin | Oral                           | 1.2             | (4)           |
| Astromicin         | Parenteral                     | 0.4             | (3)           |
| Bacitracin         | Parenteral                     | 0.68            | See text      |
| Balofloxacin       | Oral                           | 0.2             | (4)           |
| Ciclacillin        | Oral                           | 2               | (3)           |
| Garenoxacin        | Oral                           | 0.4             | (3)           |
| Gemifloxacin       | Oral                           | 0.32            | (4)           |
| Kitasamycin        | Oral                           | 1.2             | (4)           |
| Tebipenem          | Oral                           | 0.84            | (3)           |
| Xibornol           | Oral/Parenteral                | 1               | See text      |

**Supplementary Table 3: DDDs for molecules with no DDD unit value in ATC/DDD database**

| <b>Antibiotic</b>        | <b>Class</b>               | <b>Route of administration</b> | <b>DDD (gm)</b> |
|--------------------------|----------------------------|--------------------------------|-----------------|
| Alatrofloxacin           | Fluoroquinolones           | Parenteral                     | 0.5             |
| Amoxicillin/Ampicillin   | Broad-spectrum penicillins | Oral                           | 1.5             |
| Ampicillin/Sultamicillin | Broad-spectrum penicillins | Oral                           | 1.5             |
| Antofloxacin             | Fluoroquinolones           | Oral                           | 0.5             |
| Brodimoprim              | Trimethoprim               | Parenteral                     | 0.4             |
| Brodimoprim              | Trimethoprim               | Oral                           | 0.6             |
| Carfecillin              | Carbenicillins             | Oral                           | 4.0             |
| Cefacetile               | Cephalosporins             | Oral                           | 1.0             |
| Cefoselis                | Cephalosporins             | Parenteral                     | 3.3             |
| Cephalosporin C          | Cephalosporins             | Parenteral                     | 3.3             |
| Etimicin                 | Aminoglycosides            | Parenteral                     | 0.5             |
| Furbenicillin            | Broad-spectrum penicillins | Oral                           | 1.5             |
| Kitasamycin              | Macrolides                 | Parenteral                     | 1.2             |
| Meleumycin               | Macrolides                 | Parenteral/Oral                | 1.3             |
| Norvancomycin            | Glycopeptides              | Parenteral                     | 1.3             |
| Norvancomycin            | Glycopeptides              | Oral                           | 2.0             |
| Novobiocin               | Glycopeptides              | Parenteral                     | 1.7             |

|                               |                             |                 |     |
|-------------------------------|-----------------------------|-----------------|-----|
| Novobiocin                    | Glycopeptides               | Oral            | 2.0 |
| Oritavancin                   | Glycopeptidess              | Oral            | 1.2 |
| Panipenem                     | Carbapenem                  | Oral            | 2.0 |
| Penicillin G/Penicillin V     | Narrow-spectrum penicillins | Oral            | 1.5 |
| Polymyxin M                   | Polymyxins                  | Parenteral      | 0.2 |
| Polymyxin M                   | Polymyxins                  | Oral            | 0.4 |
| Roxithromycin                 | Macrolides                  | Parenteral      | 0.3 |
| Spiramycin/Metronidazole      | Macrolides                  | Parenteral      | 3.0 |
| Sulfadiazine/Tetroxoprim      | Trimethoprim                | Parenteral/Oral | 0.7 |
| Sulfadiazine/Trimethoprim     | Trimethoprim                | Parenteral/Oral | 1.0 |
| Sulfadimidine/Trimethoprim    | Trimethoprim                | Parenteral      | 0.4 |
| Sulfadimidine/Trimethoprim    | Trimethoprim                | Oral            | 1.0 |
| Sulfadoxine/Trimethoprim      | Trimethoprim                | Parenteral      | 0.4 |
| Sulfadoxine/Trimethoprim      | Trimethoprim                | Oral            | 0.6 |
| Sulfalene/Trimethoprim        | Trimethoprim                | Parenteral      | 0.4 |
| Sulfalene/Trimethoprim        | Trimethoprim                | Oral            | 0.6 |
| Sulfamerazine/Trimethoprim    | Trimethoprim                | Parenteral      | 0.4 |
| Sulfamerazine/Trimethoprim    | Trimethoprim                | Parenteral      | 0.8 |
| Sulfamethizole/Trimethoprim   | Trimethoprim                | Oral            | 0.8 |
| Sulfamethoxazole/Trimethoprim | Trimethoprim                | Parenteral/Oral | 1.9 |
| Sulfametrole/Trimethoprim     | Trimethoprim                | Parenteral/Oral | 1.9 |
| Sulfamoxole/Trimethoprim      | Trimethoprim                | Oral            | 1.9 |
| Tebipenem                     | Carbapenems                 | Parenteral      | 0.8 |
| Telavancin                    | Glycopeptides               | Parenteral      | 1.3 |
| Telavancin                    | Glycopeptides               | Oral            | 2.0 |

**Supplementary Table 4: DDDs for molecules with a route of administration or a combination of molecules with no DDD unit value in ATC/DDD database**

| <b>Antibiotic</b>          | <b>Class</b>                | <b>Route of administration</b> | <b>DDD (gm)</b> |
|----------------------------|-----------------------------|--------------------------------|-----------------|
| Amikacin                   | Aminoglycosides             | Oral                           | 1.0             |
| Ampicillin/Clavulanic Acid | Broad-spectrum penicillins  | Oral                           | 6.0             |
| Ampicillin/Sulbactam       | Broad-spectrum penicillins  | Oral                           | 6.0             |
| Arbekacin                  | Aminoglycosides             | Oral                           | 0.2             |
| Astromicin                 | Aminoglycosides             | Oral                           | 0.4             |
| Azidocillin                | Narrow-spectrum penicillins | Parenteral                     | 1.5             |
| Aztreonam                  | Monobactams                 | Oral                           | 4.0             |
| Bekanamycin                | Aminoglycosides             | Oral                           | 0.6             |
| Biapenem                   | Carbapenems                 | Oral                           | 1.2             |
| Carbenicillin              | Carbenicillins              | Oral                           | 12.0            |
| Carindacillin              | Carbenicillins              | Parenteral                     | 4.0             |
| Carumonam                  | Monobactams                 | Oral                           | 2.0             |
| Cefadroxil                 | Cephalosporins              | Parenteral                     | 2.0             |
| Cefalexin                  | Cephalosporins              | Parenteral                     | 2.0             |

|                                        |                             |                 |     |
|----------------------------------------|-----------------------------|-----------------|-----|
| Cefazolin                              | Cephalosporins              | Oral            | 3.0 |
| Cefdinir                               | Cephalosporins              | Parenteral      | 0.6 |
| Cefditoren Pivoxil                     | Cephalosporins              | Parenteral      | 0.4 |
| Cefepime                               | Cephalosporins              | Oral            | 2.0 |
| Cefixime                               | Cephalosporins              | Parenteral      | 0.4 |
| Cefotaxime                             | Cephalosporins              | Oral            | 4.0 |
| Cefotetan                              | Cephalosporins              | Oral            | 4.0 |
| Cefpirome                              | Cephalosporins              | Oral            | 4.0 |
| Cefpodoxime Proxetil                   | Cephalosporins              | Parenteral      | 0.4 |
| Ceftazidime                            | Cephalosporins              | Oral            | 4.0 |
| Ceftizoxime                            | Cephalosporins              | Oral            | 4.0 |
| Ceftriaxone                            | Cephalosporins              | Oral            | 2.0 |
| Chlortetracycline                      | Tetracyclines               | Parenteral      | 1.0 |
| Clofoctol                              | Other                       | Parenteral/Oral | 1.5 |
| Clometocillin                          | Narrow-spectrum penicillins | Parenteral      | 1.0 |
| Colistin                               | Polymyxins                  | Oral            | 0.2 |
| Dalbavancin                            | Glycopeptides               | Oral            | 1.5 |
| Dalfopristin/Quinupristin              | Macrolides                  | Oral            | 1.5 |
| Daptomycin                             | Lipopeptides                | Oral            | 0.3 |
| Demeclocycline                         | Tetracyclines               | Parenteral      | 0.6 |
| Dibekacin                              | Aminoglycosides             | Oral            | 0.1 |
| Dirithromycin                          | Macrolides                  | Parenteral      | 0.5 |
| Doripenem                              | Carbapenems                 | Oral            | 1.5 |
| Enoxacin                               | Fluoroquinolones            | Parenteral      | 0.8 |
| Ertapenem                              | Carbapenems                 | Oral            | 1.0 |
| Erythromycin Stinoprate                | Macrolides                  | Parenteral      | 1.0 |
| Flurithromycin                         | Macrolides                  | Parenteral      | 0.8 |
| Gentamicin                             | Aminoglycosides             | Oral            | 0.2 |
| Imipenem/Cilastatin                    | Carbapenems                 | Oral            | 2.0 |
| Josamycin                              | Macrolides                  | Parenteral      | 2.0 |
| Kanamycin                              | Aminoglycosides             | Oral            | 1.0 |
| Lomefloxacin                           | Fluoroquinolones            | Parenteral      | 0.6 |
| Mecillinam                             | Broad-spectrum penicillins  | Oral            | 1.2 |
| Meropenem                              | Carbapenems                 | Oral            | 2.0 |
| Metronidazole                          | Other                       | Oral            | 0.9 |
| Micronomicin                           | Aminoglycosides             | Oral            | 0.2 |
| Midecamycin                            | Macrolides                  | Oral            | 1.0 |
| Norfloxacin                            | Fluoroquinolones            | Parenteral      | 0.8 |
| Oleandomycin                           | Macrolides                  | Parenteral      | 1.0 |
| Paromomycin                            | Aminoglycosides             | Parenteral      | 3.0 |
| Penamecillin                           | Narrow-spectrum penicillins | Parenteral      | 1.0 |
| Penicillin G                           | Narrow-spectrum penicillins | Oral            | 3.6 |
| Penicillin G/Streptomycin              | Streptomycin combinations   | Oral            | 1.0 |
| Penicillin G/Penicillin V/Streptomycin | Streptomycin combinations   | Oral            | 1.0 |

|                  |                             |            |      |
|------------------|-----------------------------|------------|------|
| Penicillin V     | Narrow-spectrum penicillins | Parenteral | 2.0  |
| Pheneticillin    | Narrow-spectrum penicillins | Parenteral | 2.0  |
| Pivmecillinam    | Broad-spectrum penicillins  | Oral       | 1.4  |
| Pivmecillinam    | Broad-spectrum penicillins  | Parenteral | 0.6  |
| Pristinamycin    | Macrolides                  | Parenteral | 2.0  |
| Ribostamycin     | Aminoglycosides             | Oral       | 1.0  |
| Rokitamycin      | Macrolides                  | Parenteral | 0.8  |
| Rolitetracycline | Tetracyclines               | Oral       | 0.3  |
| Sisomicin        | Aminoglycosides             | Parenteral | 0.3  |
| Teicoplanin      | Glycopeptides               | Oral       | 0.4  |
| Telavancin       | Glycopeptides               | Oral       | 0.4  |
| Ticarcillin      | Carbenicillins              | Oral       | 15.0 |
| Tigecycline      | Glycylcycline               | Oral       | 0.1  |
| Tobramycin       | Aminoglycosides             | Oral       | 0.2  |

### ***Estimating total global antibiotic use in 2000–2015***

Total global antibiotic use was predicted in DDDs. Population data for countries not included in the MIDAS database were retrieved from the World Development Indicators in the World Bank DataBank. Average per capita antibiotic consumption was calculated for each year and national income group. Total antibiotic use in countries not included in the IQVIA MIDAS database was estimated by multiplying the country's population in each year by this average. This method was also used to predict antibiotic use in countries included in the IQVIA MIDAS database that were missing antibiotic use data in all sectors for some years.

### ***Predicting total global antibiotic use in 2015–2030***

Total global antibiotic use in DDDs between 2015 and 2030 was predicted using three scenarios of future antibiotic use. Population projections were retrieved from the World Bank DataBank for all countries except Taiwan. Population projections for Taiwan were retrieved from the Taiwan National Development Council. The World Bank data were missing population

projections for some countries; future populations for these countries were predicted using the average population growth rate in the last five years of available data.

In scenario 1, all countries continue consuming at their per capita rate of antibiotic use in 2015, accounting for changes in population. In scenario 2, all countries' per capita antibiotic consumption continues increasing at current growth rates. Current growth rate was defined as the compound annual growth rate in per capita antibiotic use in each country between 2010 and 2015. In scenario 3, all countries converged to the 2015 global median per capita antibiotic use rate by 2020, and then continued to consume at this global median through 2030 (Figure 5).



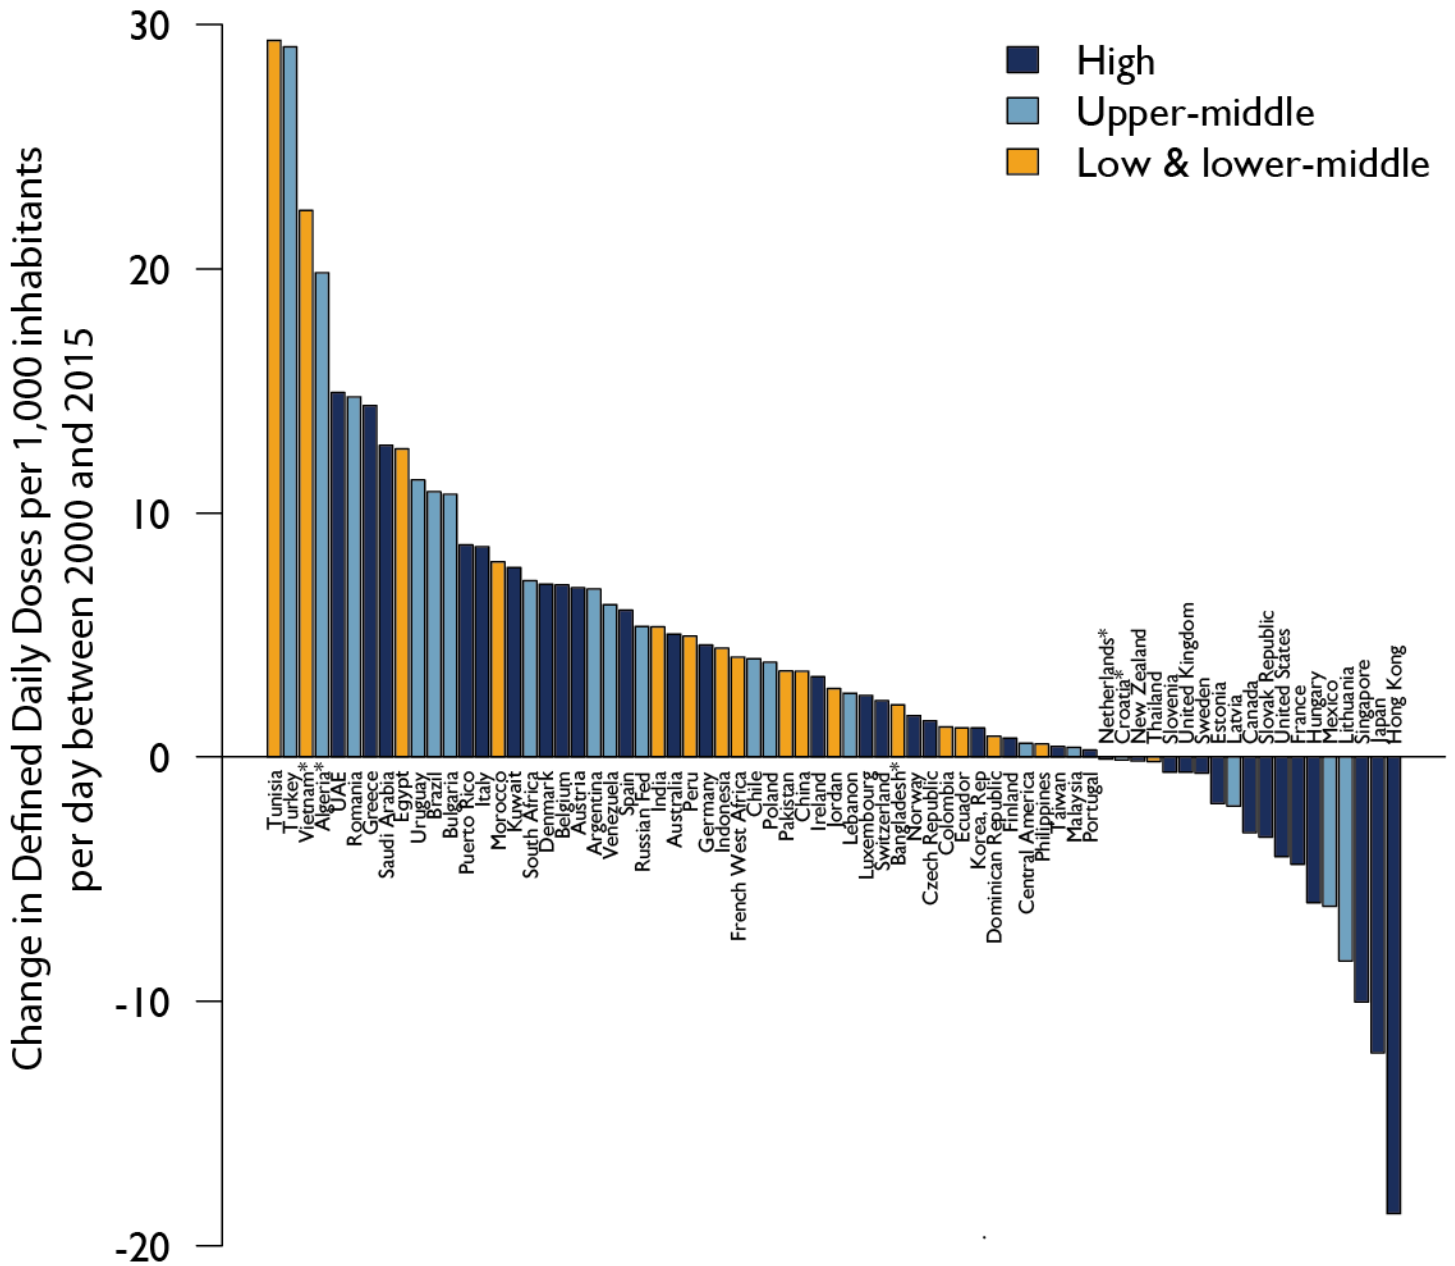

**Supplementary Figure 1.** Change in the national antibiotic consumption rate between 2000 and 2015 in defined daily doses per 1,000 inhabitants per day (DDD per 1,000 inhabitants per day). For Vietnam, Bangladesh, Netherlands, and Croatia change was calculated from 2005 as data prior to that year were not available. For Algeria, change was calculated from 2002 as data prior to that year were not available. Data source: IQVIA MIDAS, 2000–2015, IQVIA Inc. All rights reserved.

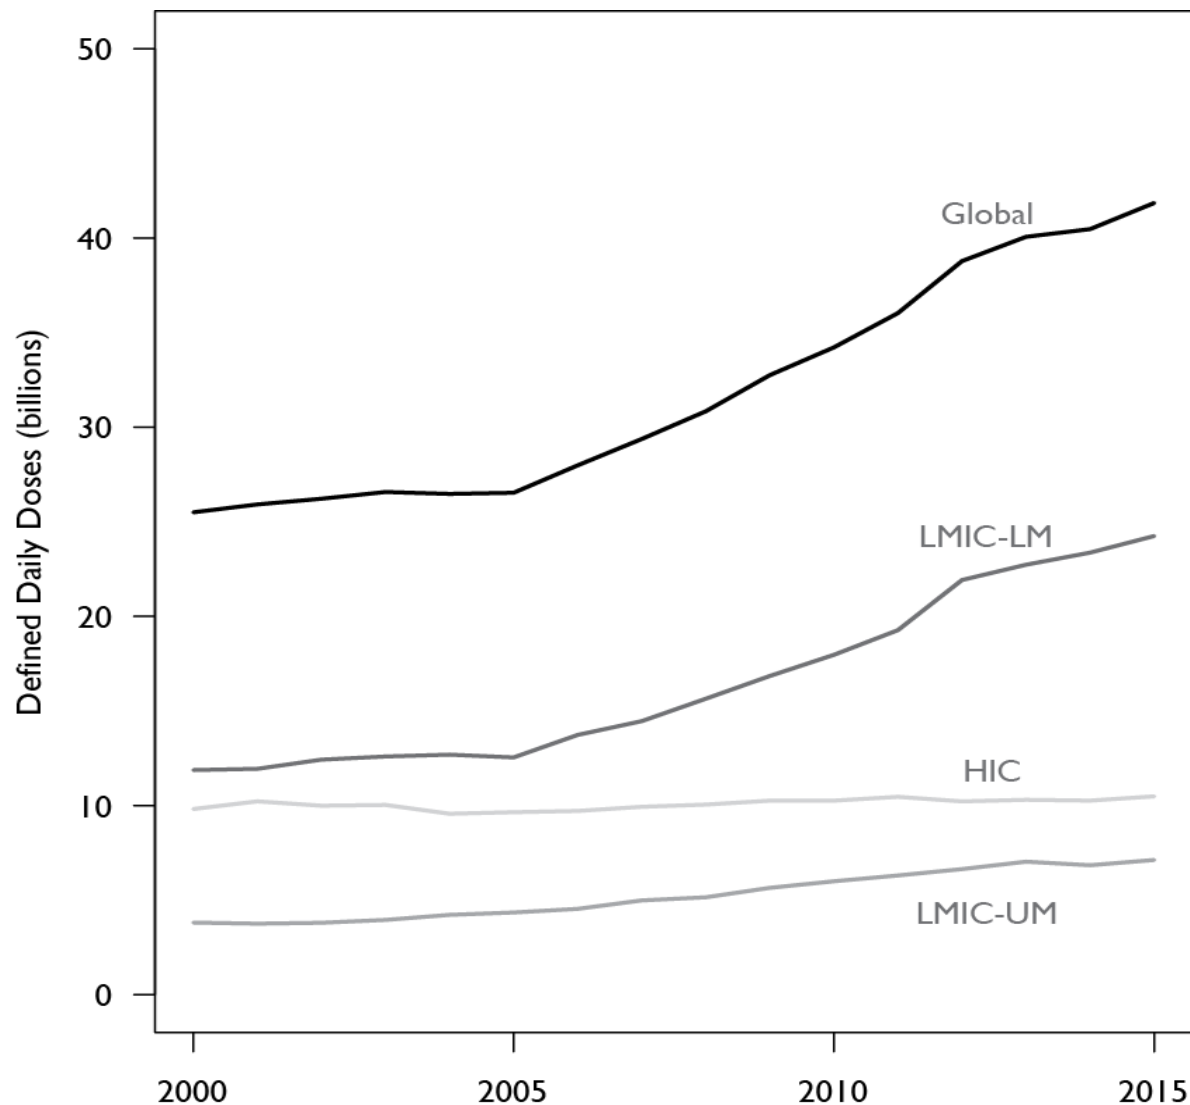

**Supplementary Figure 2.** Estimated total global antibiotic consumption, 2000–2015, by income group: High-income countries (HIC), upper-middle-income countries (LMIC-UM), and low- & lower-middle-income countries (LMIC-LM). Antibiotic consumption is estimate of total consumption for all countries in billions of DDDs, including extrapolations to countries not included in QuantilesIMS MIDAS database, broken down by country income group. Totals were estimated using antibiotic use data from 2000–2015 from the IQVIA MIDAS database and World Bank DataBank population estimates for 2000–2015. Extrapolated data was estimated by income group (see supplementary methods). Data source: World Bank DataBank and IQVIA MIDAS, 2000–2015, IQVIA Inc. All rights reserved.

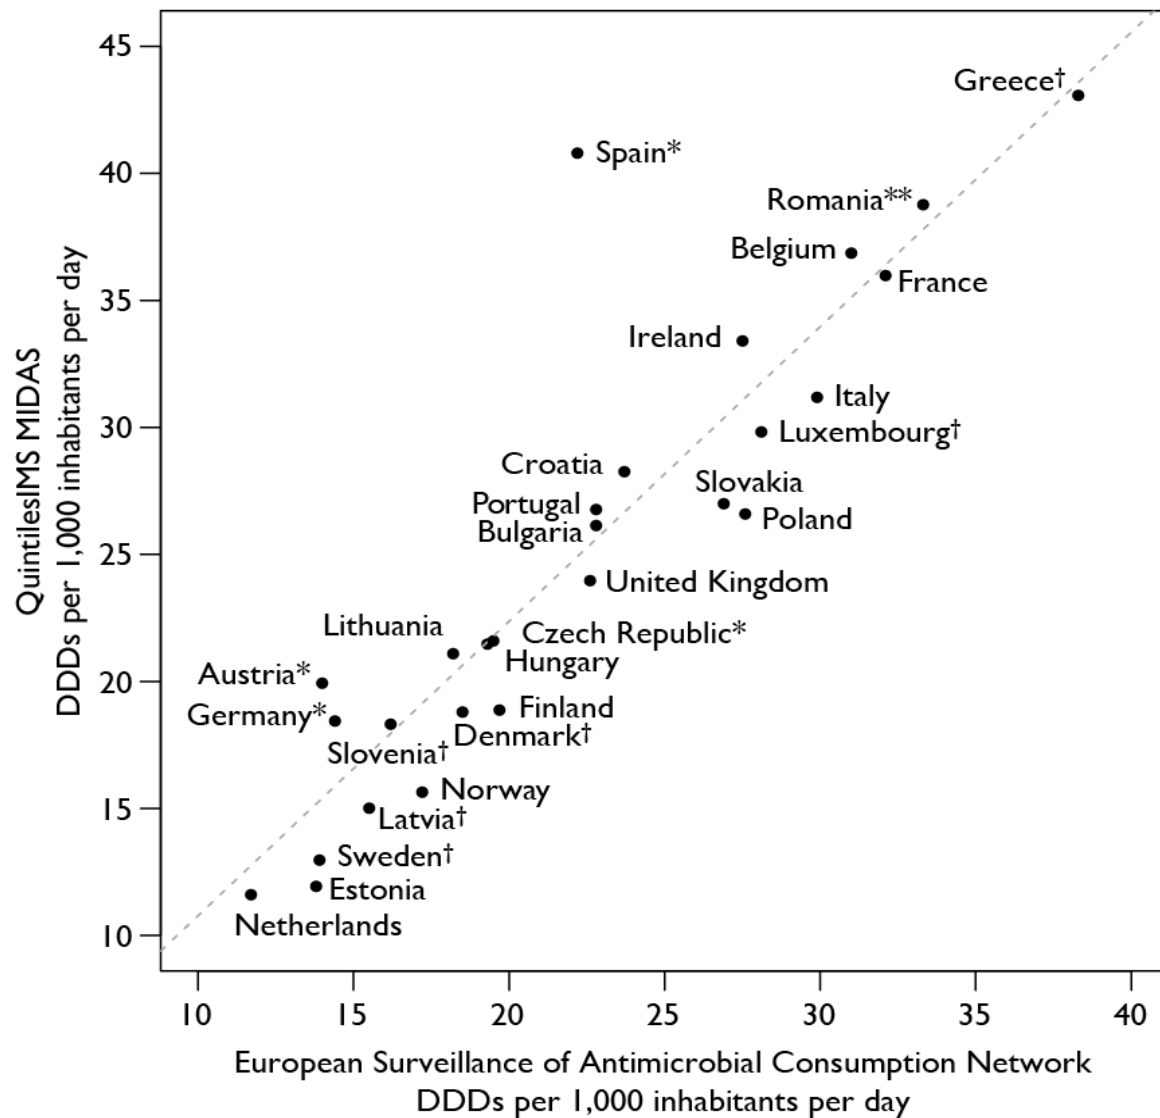

**Supplementary Figure 3.** Correlation between antibiotic consumption rates from the European Centre for Disease Prevention and Control’s European Surveillance of Antimicrobial Consumption Network (ESAC-Net) and the IQVIA MIDAS database. Each point represents the defined daily doses (DDDs) per 1,000 inhabitants per day in 2015. The gray dashed line is the linear regression of the two sets of values. The correlation coefficient between the two sets of values was 93%. \* Countries provided only community (primary care) data but not hospital data to ESAC-Net. \*\* Countries provided only total care data to ESAC-Net. † Data was only available from IQVIA for retail sector. Data source: World Bank DataBank, ESAC-Net and IQVIA MIDAS, 2000–2015, IQVIA Inc. All rights reserved.

## References

1. Falagas ME, Kasiakou SK (2006) Use of international units when dosing colistin will help decrease confusion related to various formulations of the drug around the world. *Antimicrob Agents Chemother* 50(6):2274–2275.
2. Zhang W, et al. (2008) Antibiotic use in five children's hospitals during 2002–2006: the impact of antibiotic guidelines issued by the Chinese Ministry of Health. *Pharmacoepidemiol Drug Saf* 17(3):306–311.
3. Muraki Y, et al. (2016) Japanese antimicrobial consumption surveillance: First report on oral and parenteral antimicrobial consumption in Japan (2009–2013). *J Glob Antimicrob Resist* 7:19–23.
4. Dongsook Kim, Namsoon Kim, Sukhyang Lee (2007) Determination of Defined Daily Dose of Medicines using Nominal Group Technique and Analysis of Antibiotics Use in National Insurance Claim Data: Focused on Antibiotics without DDD of WHO. *Kor J Clin Pharm* 17(1):19–32.
